# 1 **The DNA methylation landscape of five pediatric-tumor** 2 **types**

3 Alyssa C. Parker<sup>1</sup>, Badi I. Quinteros<sup>1</sup>, Stephen R. Piccolo<sup>1,\*</sup>

4 1 - Department of Biology, Brigham Young University, Provo, UT, USA

5 \* - Please address correspondence to S.R.P. at [stephen\\_piccolo@byu.edu](mailto:stephen_piccolo@byu.edu).

## 6 **Abstract**

7 Fewer DNA mutations have been identified in pediatric tumors than adult tumors, suggesting that  
8 alternative tumorigenic mechanisms, including aberrant DNA methylation, may play a prominent role in  
9 pediatric tumors. Methylation is an epigenetic process of regulating gene expression in which methyl  
10 groups are attached to DNA molecules, often in promoter regions. In Wilms tumors and acute myeloid  
11 leukemias, increased levels of epigenetic silencing have been associated with worse patient outcomes.  
12 However, to date, researchers have studied methylation primarily in adult tumors and for specific genes  
13 but not on a pan-pediatric cancer scale. We addressed these gaps first by aggregating methylation data  
14 from 309 noncancerous samples and establishing baseline expectations for each gene. Even though these  
15 samples represent diverse tissue types and population ancestral groups, methylation levels were highly  
16 consistent for most genes. Second, we compared tumor methylation levels against these baseline values  
17 for five pediatric cancer types—Wilms tumors, clear cell sarcomas of the kidney, rhabdoid tumors,  
18 neuroblastomas, and osteosarcomas. Hypermethylation was more common than hypomethylation—as  
19 many as 11.8% of genes were hypermethylated in a given tumor, compared to a maximum of 4.8% for  
20 hypomethylated genes. For each cancer type, genes with the highest variance exhibited consistently

21 divergent methylation patterns for distinct patient subsets. We evaluated whether genomic and  
22 epigenomic abnormalities contribute to pediatric tumorigenesis in a mutually exclusive manner but did  
23 not find evidence of this phenomenon. Furthermore, even though oncogenes are commonly upregulated in  
24 tumors, and tumor-suppressor genes are commonly downregulated in tumors, we did not find statistical  
25 evidence that methylation drives such patterns on a broad scale in pediatric tumors.

## 26 **Introduction**

27 Pediatric tumors are the leading cause of disease-related death for children in developed countries<sup>1</sup>, and  
28 those who survive pediatric cancer often experience adverse health challenges later in life<sup>2</sup>. Many  
29 mutations and structural variants have been associated with adult forms of cancer<sup>3</sup>; however, significantly  
30 fewer genomic abnormalities have been identified in pediatric tumors<sup>4</sup>. The mutation rate in pediatric  
31 tumors is 14 times less than the mutation rate in adult tumors, implying that different mechanisms may be  
32 involved in pediatric-cancer development than in adult cancers<sup>5</sup>. Of the mutations that have been  
33 identified in pediatric tumors, many are associated with epigenetic regulation<sup>1</sup>. In many pediatric tumors,  
34 molecular profiling does not identify genomic abnormalities but does show abnormal DNA methylation  
35 patterns<sup>6,7</sup>, suggesting the DNA methylation may play a critical role in tumorigenesis in these cases.

36 Gene-expression levels in cancer cells often vary from those in normal cells<sup>8</sup>. Such abnormalities alter  
37 cellular environments and manipulate cellular processes, leading to increased survival, rapid proliferation,  
38 and metastasis<sup>9</sup>. Oncogenes are one type of genes that contribute to the development of these abnormal  
39 features. These genes are often expressed at higher levels in cancer cells than in normal cells<sup>10</sup>. Another  
40 type of genes known as tumor suppressor genes counteracts cellular changes that lead to cancer. These  
41 genes are often expressed at lower levels in tumor cells than in normal cells<sup>11</sup>, potentially leading to rapid  
42 cellular proliferation. Methylation of the promoter region is often negatively correlated with gene  
43 expression levels, suggesting that DNA methylation plays a role in regulating gene expression<sup>12,13</sup>.

44 However, relatively little is known about global methylation patterns in pediatric tumors, the interplay  
45 between methylation events and mutations in pediatric tumors, or how these observations may differ  
46 between known cancer genes (oncogenes and tumor suppressors) and other genes. Prior studies have  
47 focused on cancer cell lines, a single tumor type at a time, or adult cancers<sup>14-16</sup>.

48 Computational models have been developed to identify differentially expressed genes across large sets of  
49 methylation data<sup>15,17</sup>. Applications of these methods have found several genes with highly variant  
50 methylation in adult tumors<sup>17</sup>. Many of the genes that exhibited highly variant methylation in tumors were  
51 not previously associated with cancer, and genomic aberrations in these genes were not characteristic of  
52 tumors. A small-scale study of Wilms tumors (a common pediatric cancer) showed similar results<sup>17</sup>. It has  
53 been shown that several distinct types of cancer, including endometrioid adenocarcinomas and  
54 glioblastomas, share many differentially methylated regions, suggesting that these epigenetic markers  
55 may be a universal feature of cancer<sup>18</sup>.

56 While these findings hint that aberrant methylation patterns may also be characteristic of pediatric cancer,  
57 most pediatric cancers have not been analyzed for DNA methylation patterns. One study investigated  
58 genomic, transcriptomic, and epigenomic patterns in acute myeloid leukemia and identified dozens of  
59 hypermethylated genes and age-specific patterns<sup>19</sup>. Additionally, structural variations were found to be  
60 more common than single nucleotide polymorphisms. A separate analysis of acute lymphoblastic  
61 leukemia identified a number of genes on chromosome 3, including PPP2R3A, THRB and FBLN2, that  
62 were frequently hypermethylated<sup>16</sup>.

63 Little work has been done to specifically investigate aberrant methylation of oncogenes and tumor  
64 suppressor genes in cancer. One study about endometrial cancer identified seven oncogenes that were  
65 hypomethylated and upregulated and twelve tumor suppressor genes that were hypermethylated and  
66 downregulated<sup>14</sup>, suggesting that changes in DNA methylation impact gene expression and may target  
67 oncogenes and tumor suppressor genes.

68 We address these gaps by analyzing methylation data for five types of pediatric cancers: Wilms tumors,  
69 clear cell sarcomas of the kidney, rhabdoid tumors, neuroblastomas, and osteosarcomas. We compare  
70 these cancer types against each other. Furthermore, as a baseline reference, we compare the tumor data  
71 against methylation levels for fetuses and children representing normal conditions for diverse cell types  
72 and human populations. Because methylation events tend to be gene specific<sup>20</sup>, we evaluate gene-level  
73 patterns. But we also consider global methylation patterns. For many of the tumors, we identify genomic  
74 alterations—single-nucleotide variants, small indels, and structural variants—in the tumors and evaluate  
75 whether these somatic mutations exhibited gene-specific mutual exclusivity with hypo- or  
76 hypermethylation events. In addition, we evaluate the consistency of these findings for oncogenes and  
77 tumor suppressor genes.

## 78 **Results**

79 Our goal was to evaluate gene-level DNA methylation patterns for pediatric-tumor cells and normal cells.  
80 We used publicly available data to characterize five types of pediatric cancers as well as baseline  
81 methylation levels for normal cells. First, we evaluated the consistency of methylation levels representing  
82 non-cancerous states in fetuses and children. Second, we compared tumor methylation levels against the  
83 normal values and identified genes and tumor samples that exhibited patterns of hypomethylation or  
84 hypermethylation. Next, under the assumption that tumors with aberrant methylation would be subject to  
85 evolutionary constraints that are redundant with those resulting from somatic mutations, we evaluated  
86 whether these two event types were mutually exclusive in a given tumor. Finally, we examined these  
87 patterns within known oncogenes and tumor-suppressor genes.

### 88 **Consistency of methylation levels in normal samples and in pediatric tumors**

89 To aid in understanding how methylation levels change in cancer cells, we first characterized baseline  
90 methylation levels for individual genes. We obtained Illumina Infinium 450K data for four normal

91 datasets. We used data from diverse cell types and human populations with the goal of identifying  
92 methylation patterns that broadly represent baseline methylation states for healthy children. The datasets  
93 were from chorionic villi, kidney, spinal cord, brain, muscle, nasal epithelial, and blood cells and included  
94 data for a total of 309 patients of North American (n = 94), African American (n = 36), and Australian  
95 ancestry (n = 179).

96 Because DNA methylation contributes to regulating gene expression, we expected most genes to exhibit a  
97 consistent baseline methylation range. We anticipated that many genes (such as tumor suppressor genes)  
98 would have consistently low methylation levels because those genes must be consistently expressed to  
99 properly regulate cellular division, growth, and other proliferation activities. We anticipated that other  
100 genes (such as oncogenes) would have consistently high levels of methylation because proper cellular  
101 functioning requires that these genes remain relatively inactive. We expected to see some variance across  
102 samples because we included data from multiple cell types and because methylation levels change as cells  
103 respond to internal and external cues. We also anticipated that some genes would deviate from these  
104 patterns, perhaps in part because they are regulated by mechanisms other than DNA methylation. Based  
105 on a preliminary inspection of the data, we identified thresholds for categorizing genes based on the  
106 magnitude and variance of methylation levels. We considered genes with a median value less than 0.2  
107 across all samples in a given dataset to be methylated at “low” levels, genes with a median greater than  
108 0.6 to be methylated at “high” methylation levels and the remaining genes as having “medium”  
109 methylation levels. We categorized genes with a coefficient of variation (CV) less than 0.5 in a given  
110 dataset as having “low” variance and the remaining genes as having “high” variance. In the largest normal  
111 dataset (GSE89278), most genes exhibited low (58.9%) or medium methylation levels (25.6%).  
112 Relatively few genes exhibited high methylation (15.5%), meaning that under normal conditions, most  
113 genes appear not to be subject to strong expression constraints as a result of DNA methylation. Nearly all  
114 genes (95.1%) exhibited low variance. The other normal datasets reflected similar patterns.

115 By combining these two ways of categorizing the genes (Additional Data File S1), we found that the most  
116 common combination across all datasets was low methylation / low variance (56.9-57.2% per dataset).  
117 For GSE89278, the following numbers of genes fell into each category: low methylation / low variance:  
118 12,874; low methylation / high variance: 534; medium methylation / low variance: 3,898; medium  
119 methylation / high variance: 14; high methylation / low variance: 5,246; high methylation / high variance:  
120 0. These results were similar for the other normal datasets. To explore the consistency of these patterns  
121 across the normal datasets, we classified each gene into the following consistency levels: consistent (same  
122 category in all four datasets), semiconsistent (same category in three datasets), and inconsistent (same  
123 category in two or fewer datasets). Of the 22,253 genes that we profiled, 20,089 were consistent, 1,512  
124 were semiconsistent, and 652 were inconsistent (Figure 1). Thus even though the normal datasets differed  
125 based on cell type and population ancestral groups, gene-level methylation levels were largely consistent.

126 The gene with the smallest variance across the normal datasets was BTG3 (variance = 2.09E-5). In each  
127 of the normal datasets, BTG3 exhibited low methylation, suggesting that a biological constraint  
128 suppresses methylation of this gene under normal circumstances. The process that normally keeps BTG3  
129 methylation low may be disrupted in tumors. Indeed, hypermethylation of the promoter region of BTG3  
130 has previously been associated with several types of cancer, including breast<sup>21</sup>, prostate<sup>22</sup>, and renal<sup>23</sup>. The  
131 gene with the largest variance across the normal datasets was DOCK11. Information about this gene is  
132 sparse in the literature. Its role in cancer<sup>24</sup> and hypercholesterolemia<sup>25</sup> has been discussed. Its high  
133 variance in normal cells suggests that consistent expression of DOCK11 is inessential to normal cellular  
134 function and/or that processes other than promoter methylation regulate its expression.

### 135 **Tumor methylation relative to normal levels**

136 Under the hypothesis that tumorigenesis alters local and global methylation patterns, we evaluated the  
137 extent to which methylation levels and variances differed for a given gene between normal and tumor  
138 conditions. For each gene, we compared the most common median / variance category across the four  
139 normal datasets against the most common category across the five cancer datasets. Typically genes stayed

140 under the same category. For example, of the 12,368 genes that were categorized as low methylation / low  
141 variance for the normal datasets, only 549 (4.4%) changed categories: either to low methylation / high  
142 variance (n = 462) or to medium methylation / low variance (n = 87) (Table 1). The 227 genes in the  
143 medium methylation / high variance category were most likely to change categories, with 137 genes  
144 (60.0%) changing to low methylation / high variance and 19 genes (8.4%) changing to medium  
145 methylation / low variance. For the 512 genes that changed median methylation levels, approximately half  
146 (n = 259, 50.6%) increased (from low to medium or medium to high). For the 562 genes that changed  
147 variance categories, 519 (92.3%) increased from low to high variance. These increased variances suggest  
148 that the factors that normally keep methylation levels stable under normal conditions often become  
149 dysregulated in tumors. Altered expression of these genes may play a role in tumor development or may  
150 lead to downstream effects that affect tumor development. For example, if methylation levels of an  
151 oncogene are decreased, higher expression of the gene may result, leading to increased cellular growth,  
152 proliferation, or survival<sup>9</sup>. On the other hand, increased methylation levels of a tumor suppressor gene  
153 could cause lower gene expression and prevent it from performing regulatory functions<sup>13</sup>.

154 To identify genes that may influence pediatric tumorigenesis, we compared tumor methylation levels for  
155 each gene against the respective normal values on a per-cancer basis. We used a two-sided, Mann-  
156 Whitney U test and adjusted for multiple tests using the Benjamini-Hochberg False Discovery Rate  
157 (FDR)<sup>26</sup>. We considered genes with an FDR < 0.05 and an absolute methylation change > 0.02 to be  
158 statistically significant. Out of the 22,253 genes we analyzed, 37 exhibited differential methylation for at  
159 least one cancer type. Of these genes, 19 had decreased methylation in tumors, and 18 had increased  
160 methylation, including 15 genes that were differentially methylated for Wilms tumors, 0 for clear cell  
161 sarcomas, 6 for rhabdoid tumors, 17 for neuroblastomas, and 4 for osteosarcomas; 4 genes were  
162 statistically significant for 2 or more cancer types (Table S1; Figure 2). We note that the number of  
163 significant genes was smaller for cancer types with relatively small sample sizes.

164 We performed a pathway analysis for the significant genes from each cancer type using reactome.org<sup>27,28</sup>.  
165 For Wilms tumors, rhabdoid tumors, and osteosarcomas, pathways associated with ubiquitination,  
166 transcriptional regulation, and growth signaling were significant; for neuroblastomas, growth-signaling,  
167 integrin-signaling, and blood-biosynthesis pathways were among the most significant. Additional Data  
168 Files S2-S5. These functions have plausible connections to tumor biology because they are central to  
169 cellular function in general,<sup>29,30</sup> but it is difficult to make precise inferences due to the relatively small  
170 numbers of significant genes.

171 To characterize differences in methylation across the five cancer types, independent of normal  
172 methylation levels, we performed a one-way ANOVA test for each gene and adjusted the p-values using  
173 the FDR correction. Methylation levels of most genes were consistent across the 5 cancer types, including  
174 for genes that we had identified as being differentially methylated in tumors compared to normal cells.  
175 Methylation levels for 19 genes differed significantly across the cancer types (FDR < 0.05; Table S2;  
176 Figure 3). But in most cases, the mean differences were small. For example, the largest absolute  
177 difference in mean methylation between tumor types for any of the significant genes was an increase of  
178 0.24 in CCSK compared to RT (KCNQ1OT1 gene). Of the 19 genes, 10 fell into the medium methylation  
179 / low variance category, a higher proportion (0.526) than the overall proportion of genes in this category  
180 (0.175).

181 Next we focused on the 20 genes for which methylation levels varied most across all tumor types and  
182 plotted the methylation values, relative to normal levels, for each patient (Figure 4). Some tumors  
183 exhibited relatively high methylation levels for nearly all of these genes, whereas other tumors exhibited  
184 relatively low methylation levels for the same genes. This was especially true for Wilms tumors, rhabdoid  
185 tumors, and osteosarcomas. For example, the average methylation difference (relative to normals) for  
186 these 20 genes was 0.13 for 58 (44.3%) of the Wilms tumors but -0.11 for the remaining tumors. For the  
187 osteosarcomas and rhabdoid tumors, we observed a similar pattern in which subsets of 49 (57.0%) and 35  
188 (51.5%) tumors, respectively, showed markedly higher methylation levels than the remaining tumors.



189 These patterns of consistently divergent methylation might be useful for identifying tumor subtypes in a  
190 precision-medicine context<sup>31</sup> and may be driven by factors such as the presence of somatic mutations and  
191 structural alterations that affect global methylation in characteristic ways.

192 To investigate global methylation patterns, we calculated gene-level z-scores for each tumor using the  
193 normal data as a reference. In cases where a tumor's methylation value was more than three standard  
194 deviations higher than the mean normal value for a particular gene, we classified that gene as being  
195 hypermethylated in that tumor. In cases where a tumor's methylation value was more than three standard  
196 deviations lower than the mean normal value for a particular gene, we classified that gene as being  
197 hypomethylated in that tumor. Then we calculated the proportion of hypomethylated and hypermethylated  
198 genes for each patient. We categorized tumors for which greater than 1% of genes were hypermethylated  
199 as being “frequently hypermethylated” and tumors for which greater than 1% of genes were  
200 hypomethylated as being “frequently hypomethylated.” Frequent hypermethylation was more common  
201 (17.5% of tumors) than frequent hypomethylation (3.4%)(Figure 5). The maximum percentage of  
202 hypermethylated genes for any particular patient was 11.8%, compared to a maximum of 4.8% for  
203 hypomethylated genes.

#### 204 **Cancer mutation data analysis**

205 Although they occur less frequently in pediatric tumors than in adult tumors, somatic mutations often  
206 contribute to pediatric tumorigenesis<sup>4,5</sup>. To evaluate the frequency of and interplay between somatic  
207 mutations and methylation events, we examined pediatric tumors for which both data types were  
208 available. Mutation data were available for somatic single nucleotide variants (SNVs),  
209 insertions/deletions (indels), and RNA fusions. We used the RNA fusion data as indicators of structural  
210 DNA variants. Copy-number data were available for only a small number of tumors, so we did not  
211 include this data type in the analysis. Methylation, SNV, indel, and RNA fusion data were available for  
212 Wilms tumors (n = 41), neuroblastomas (n = 65), and osteosarcomas (n = 66) but not for the other tumor  
213 types. For a given tumor, we considered genes with at least one SNV, indel, or RNA fusion event to be

214 “mutated.” Across all tumor types, aberrant methylation—via either hypomethylation or  
215 hypermethylation of a given gene—occurred less frequently (in 1.1% of tumors) than mutations (2.8%);  
216 the largest disparity occurred for neuroblastomas (Table S3). Wilms tumors and osteosarcomas were  
217 aberrantly methylated nearly twice as often as neuroblastomas (1.4% vs. 0.8%; Table S3). In contrast,  
218 Wilms tumors and osteosarcomas were mutated less than half as often as neuroblastomas (1.7-1.8%  
219 vs. 4.6%).

220 Aberrant methylation levels and damaging mutations can have similar downstream effects in tumors<sup>32</sup>.  
221 After one of these alteration types has occurred in a given gene, it may be less likely for cells with a  
222 second alteration in the same gene to gain an additional selective advantage. Thus, having both a mutation  
223 and aberrant methylation in one gene may be less likely than expected by random chance. This mutual-  
224 exclusivity hypothesis has been examined extensively for pairs of genes in which somatic mutations  
225 might occur across diverse types of cancers<sup>33-36</sup>. It has also been investigated for DNA methylation  
226 events, though to a lesser extent<sup>37</sup>. Little is known about mutual exclusivity between methylation events  
227 and somatic mutations in pediatric tumors.

228 Treating each combination of tumor and gene as an independent observation, we examined whether DNA  
229 methylation events are mutually exclusive with somatic mutations. Mutations and aberrant methylation  
230 co-occurred rarely (0.03%) in the same gene and the same tumor (Table S3). Because both of these event  
231 types are rare, we reduced the data to the 962 genes for which at least 5 mutation events and at least 5  
232 aberrant methylation events had occurred across the cancer types. We used a permutation test to evaluate  
233 whether mutations and aberrant methylation in the same gene and tumor co-occurred less frequently than  
234 would be expected by random chance. Across all tumors and the 962 genes, we observed 318 co-  
235 occurrences, whereas the average number of co-occurrences in the permuted data was 341.6. However,  
236 this difference was not statistically significant ( $p = 0.092$ ).

237 **Oncogenes and tumor suppressor genes**

238 Because oncogenes are typically expressed at relatively high levels and tumor suppressor genes are  
239 typically expressed at relatively low levels, we expected that oncogenes would have higher methylation  
240 levels than tumor suppressor genes. We identified 80 “tier 1” oncogenes and 141 “tier 1” tumor  
241 suppressor genes in the Cancer Genome Census<sup>38</sup> and calculated the mean methylation value for each  
242 gene in the normal datasets and used a two-sample t-test to evaluate whether these mean values differed  
243 between the oncogenes and tumor suppressor genes. Under the hypothesis that oncogenes would be  
244 methylated at higher levels than tumor-suppressor genes, we used a one-sided test. The mean of the  
245 means for oncogenes was 0.02 higher than for tumor-suppressor genes; however, this difference was not  
246 statistically significant ( $p = 0.109$ ). Many tumor-suppressor genes were highly methylated, and many  
247 oncogenes were methylated at low levels (Figure S1).

248 Next we evaluated the extent to which methylation levels differed for oncogenes and tumor-suppressor  
249 genes between tumor and normal conditions. First, we filtered the results from the two-sided Mann-  
250 Whitney U tests described above to include only oncogenes and tumor suppressor genes. Using FDR <  
251 0.05 and an absolute mean difference > 0.02 as constraints, only 1 tumor suppressor gene was statistically  
252 significant (CTCF in Wilms tumors). No oncogenes reached statistical significance. We relaxed the  
253 threshold to FDR < 0.2 and removed the mean difference constraint. In this case, CTCF was significant  
254 for all cancer types except CCSKFigure S2. DNMT2 (a tumor suppressor gene) was significant for OS, and  
255 GNA11 (an oncogene) was significant for NBLTable S4. Mean methylation values for none of the  
256 oncogenes or tumor suppressor genes differed across the tumor types (FDR < 0.2; Table S2).

257 Across the tumor types, mutation rates for oncogenes and tumor suppressor genes (0.031-0.089) were  
258 approximately twice the mutation rates for other genes (0.017-0.046) (Table 2), which aligns with prior  
259 evidence that mutations in these genes are associated with tumorigenesis. However, aberrant methylation  
260 rates for oncogenes and tumor suppressor genes (0.007-0.014) were approximately equal to methylation  
261 rates for other genes (0.008-0.014). In Wilms tumors and osteosarcomas, mutation rates for oncogenes

262 and tumor suppressor genes were approximately three times higher than aberrant methylation rates, while  
263 mutation and methylation rates were approximately equal for other genes. In neuroblastomas, mutation  
264 rates for oncogenes and tumor suppressor genes were approximately twelve times higher than aberrant  
265 methylation rates but only six times higher for other genes.

266 We performed a modified version of the permutation-based, mutual-exclusivity analysis in which we  
267 searched for co-occurrences of either 1) a mutation in an oncogene and aberrant hypomethylation of the  
268 same gene or 2) a mutation in a tumor suppressor gene and hypermethylation of the same gene. Because  
269 few genes met these criteria, we performed this analysis with the oncogenes ( $n = 4$ ) and tumor-suppressor  
270 genes ( $n = 29$ ) that were mutated in at least 2 tumors and aberrantly methylated in at least 2 tumors. These  
271 event combinations were not mutually exclusive for oncogenes ( $p = 0.90$ ) nor for tumor suppressors ( $p =$   
272  $0.54$ ).

## 273 **Discussion**

274 Using publicly available data, we examined methylation patterns for five childhood cancers. We  
275 summarized baseline methylation levels for healthy children, identified deviations from these baseline  
276 levels in tumors, and evaluated mutual exclusivity of methylation events and somatic mutations.  
277 Subsequently, we evaluated these patterns for oncogenes and tumor-suppressor genes specifically. In the  
278 309 healthy samples we studied, DNA methylation levels were highly consistent, suggesting that  
279 biological processes maintain this consistency in diverse tissue types and ancestral groups. In the 531  
280 tumors we studied, hypermethylation or hypomethylation of promoter regions was a common feature,  
281 providing additional evidence that the tumor epigenome contributes to pediatric tumorigenesis.  
282 Hypermethylation was more common than hypomethylation. Hypermethylation of promoter regions has  
283 been associated with decreased gene expression<sup>12</sup>—tumors with frequent hypermethylation may result in  
284 broad silencing of proteins necessary for normal cellular function. Hypermethylation affecting multiple

285 genes in the same tumor has been identified in adult thyroid neoplasms<sup>39</sup> and colorectal tumors<sup>40</sup> and has  
286 been associated with multidrug resistance in cell cultures<sup>41</sup>. However, global hypomethylation has  
287 garnered more attention than multigene hypermethylation<sup>42</sup>. Yet in the pediatric-tumor samples that we  
288 examined, widespread hypomethylation in a given tumor was uncommon. We also observed tumor  
289 subsets that exhibited divergent methylation—methylation levels for specific genes were consistently  
290 either high or low in many tumors of a given cancer type. While methylation dysregulation may be a  
291 common feature of pediatric tumors in general, specific mechanisms may drive these divergent changes in  
292 each tumor subset, and there may be overlap in these mechanisms across cancer types. Identifying such  
293 mechanisms may be useful for developing targeted treatments and informing patients.

294 Our mutual-exclusivity analysis did not provide evidence that somatic mutations and aberrant methylation  
295 are mutually exclusive with each other, whether for oncogenes and tumor-suppressor genes specifically or  
296 across all genes. However, we had access to a limited number of tumors (n = 172) for which both  
297 mutation data and methylation data were available; a larger-scale analysis is warranted. Furthermore, we  
298 evaluated single-nucleotide variants, indels, and structural variants because data were available for these  
299 mutation types. But large-scale amplifications and deletions occur regularly in tumors<sup>43</sup>, so including  
300 copy-number data in this type of analysis would also be useful in future research.

301 In normal cells, methylation levels did not differ significantly between known cancer genes (oncogenes  
302 and tumor suppressors) and other genes. In tumors, few oncogenes and tumor suppressors had high rates  
303 of aberrant methylation, suggesting that while aberrant methylation occurs in pediatric tumors,  
304 dysregulation likely does not occur disproportionately in these known gene categories. Global  
305 hypermethylation and/or hypomethylation patterns may be more important indicators of pediatric-tumor  
306 biology than local events. However, CTCF may be one exception. CTCF promoter methylation was  
307 significantly increased relative to normal conditions in every cancer type that we examined, except clear  
308 cell sarcoma of the kidney, which had a small sample size. CTCF codes for a zinc finger nuclease that is  
309 highly conserved in eukaryotes<sup>44</sup>. As a regulatory protein involved in DNA methylation<sup>45</sup>, improper

310 function of this gene could lead to epigenetic abnormalities. Mutations in CTCF have previously been  
311 associated with several cancer types, including breast cancers, prostate cancers, and Wilms tumors<sup>46,47</sup>.  
312 Our findings across multiple pediatric cancer types suggest that CTCF hypermethylation—and  
313 consequent inhibition of gene expression— may influence pediatric tumorigenesis broadly and cause  
314 downstream effects.

315 In performing these analyses, we needed to choose arbitrary thresholds at times. For example, we  
316 specified three standard deviations above or below the mean in the normal data as a conservative  
317 threshold to indicate aberrant methylation. Using this threshold, we found that tumors were mutated more  
318 frequently than they were aberrantly methylated. However, if we had relaxed this threshold to two  
319 standard deviations, the average aberrant methylation rate would have been 0.045 rather than 0.012 (the  
320 average mutation rate was 0.027). Thus, our conclusions would have been moderately different. The use  
321 of arbitrary thresholds in research is common and cannot be completely avoided, especially when  
322 discipline-specific precedents have yet to be specified by the research community. In this scenario, we  
323 have introduced a new way of identifying aberrant methylation events. Future quantitative, experimental,  
324 and translational work will be necessary to improve our ability to determine when a particular gene in a  
325 given biological sample is methylated to an extent that alters that gene's behavior and may in turn have  
326 clinical relevance.

327 A better understanding of DNA methylation's role in pediatric tumors could shed light on mechanisms of  
328 tumorigenesis and eventually lead to insights about patient care and treatments. DNA methylation  
329 inhibitors have proven effective in some adult cancers, especially hematologic malignancies<sup>20</sup> and may  
330 prove beneficial in pediatric cases. However, these therapies primarily target hypermethylation in a broad  
331 sense and thus may not be suitable for targeting specific genes<sup>48,49</sup>. Furthermore, as we have shown,  
332 hypermethylation events may be more common than hypomethylation events in pediatric tumors. Little is  
333 understood about how to reverse hypomethylation *in vivo*; however, global-hypomethylation patterns

334 may be useful as biomarkers for therapies for targeting genes that have been activated as a result of  
335 hypomethylation.

## 336 **Methods**

### 337 **Normal methylation datasets**

338 We downloaded datasets containing DNA methylation levels for cohorts of normal patients as a way to  
339 establish a baseline against which tumor methylation could be compared for pediatric samples. We  
340 selected four datasets from Gene Expression Omnibus that used Illumina Infinium  
341 HumanMethylation450K arrays to profile normal cells in healthy fetuses and children aged 18 or under  
342 for which raw (.idat) files were available. Illumina Infinium HumanMethylation450K is a microarray  
343 platform that detects DNA methylation at over 450,000 locations in the human genome. Beta values from  
344 these arrays indicate the ratio of methylated signals to unmethylated signals<sup>50</sup>. Values closer to one  
345 indicate relatively high methylation levels; values closer to zero indicate relatively low methylation  
346 levels. Below we describe each dataset included in the study and provide accession identifiers from Gene  
347 Expression Omnibus.

348 GSE69502 originated from a study of Canadian second trimester fetuses<sup>51</sup>. Tissue was collected from  
349 chorionic villi, kidney, spinal cord, brain, and muscle. The original study analyzed DNA methylation  
350 differences in fetuses with spina bifida and anencephaly compared to normal fetuses. We included only  
351 data from the 65 normal fetuses.

352 GSE65163 originated from a study of nasal epithelial cells from African American children aged 10-12<sup>52</sup>.  
353 The original study analyzed DNA methylation differences in children with or without asthma. We  
354 included only data from the 36 children without asthma.

355 GSE109446 originated from a study of children aged 5-18 living in Cincinnati, Ohio (USA)<sup>53</sup>. Similar to  
356 GSE65163, nasal epithelial cells were used, and the goal of the original study was to understand  
357 methylation differences in children with or without asthma. We included only data from the 29 children  
358 without asthma.

359 GSE89278 originated from a study of Australian infant blood spot samples taken at birth<sup>54</sup>. The goal of  
360 the original study was to understand methylation differences in children with and without  
361 docosahexaenoic acid deficiency. We included only control data from 179 infants.

362 We chose these samples because they represented a variety of cell types and ancestral groups, which we  
363 hoped would make our findings more broadly generalizable than if our samples had been from a single,  
364 homogeneous population. Another factor in our decision was the age of the individuals. We searched for  
365 datasets representing relatively young patients to limit the possible confounding factor of methylation  
366 changes accumulating throughout life. In this process, we considered one additional normal dataset  
367 (GSE72556)<sup>55</sup>; however, we found that the beta levels from this dataset were consistently different from  
368 the other four normal datasets. This dataset originated from saliva samples, which often result in  
369 systematically different methylation levels than other types of samples<sup>56-58</sup>, perhaps due to external  
370 contaminants or different sample-collection procedures. As a result, we excluded this dataset from our  
371 analysis.

## 372 **Normal data processing**

373 We processed the data using the minfi package (version 1.34.0) from R (version 4.0.2) and the  
374 Bioconductor suite<sup>59,60</sup>. We followed a standard workflow to process the methylation array files. The steps  
375 in this workflow included preprocessing, ratio conversion, and beta value calculations. We then  
376 summarized the beta values at the gene level. We mapped probes to genes based on an annotation file  
377 created by Price et al. (see <http://www.ncbi.nlm.nih.gov/geo/query/acc.cgi?acc=GPL16304>)<sup>61</sup>. Because  
378 we were interested in methylation changes in the promoter regions of genes, we included only probes



379 within 300 base pairs of transcription start sites. We then calculated gene-level beta values for each  
380 patient as the mean beta value across all remaining probes in a given gene.

### 381 **Methylation data acquisition and processing**

382 We obtained methylation data representing five tumor types from the Therapeutically Applicable  
383 Research to Generate Effective Treatments (TARGET) Data Matrix (retrieved August 24, 2020 from  
384 Website, <https://ocg.cancer.gov/programs/target/data-matrix>). We acquired data for 131 patients with  
385 Wilms tumor, 11 patients with clear cell sarcoma of the kidney, 68 patients with rhabdoid tumor, 235  
386 patients with neuroblastoma, and 86 patients with osteosarcoma. We downloaded the data from TARGET  
387 using the rvest package (version 0.3.6)<sup>62</sup>. The data for Wilms tumors, clear cell sarcomas of the kidney,  
388 neuroblastomas, and osteosarcomas were generated using the Illumina Infinium HumanMethylation450K  
389 platform, and the data for rhabdoid tumors were generated using the Illumina Infinium MethylationEPIC  
390 platform. The HumanMethylation450K platform produces beta values for 22,579 genes, and EPIC  
391 produces values for 22,411 genes; we limited our analysis to the 22,253 genes that overlapped between  
392 the two platforms.

393 We followed the same workflow that we used to process the normal data. We calculated probe-level beta  
394 values using minfi and summarized values at the gene-level. We used principal component analysis to  
395 assess high-level patterns across the datasets and visualized the results using a scatter plot of the first two  
396 principal components. Methylation samples from each dataset generally clustered tightly with other  
397 samples from the same dataset, demonstrating that batch effects were present Figure S3. To reduce the  
398 impact of these effects, we applied batch correction to a combined dataset that included all of the normal  
399 datasets. We used the dataset identifier as the batch variable. In addition, we logit transformed the data  
400 before performing the batch correction and inverse logit transformed the data after performing the batch  
401 correction to ensure the beta values stayed between 0 and 1. We performed these transformations using  
402 functions from the gtools package (version 3.8.2)<sup>63</sup>. Because the logit function cannot handle exact values  
403 of 0 or 1, we removed genes in which the beta values were exactly 0 or 1. We also removed genes in

404 which beta values were NA. Filtering the data in this way removed 155 (0.7%) genes (out of 22,411 total  
405 genes). To perform the batch correction, we used the ComBat function from the sva package (version  
406 3.36.0)<sup>64</sup>. After completing the batch correction, we performed another principal component analysis and  
407 visualized the results. The points no longer clustered by datasetFigure S3. We used these newly corrected  
408 values for all remaining analyses.

#### 409 **Somatic-mutation data acquisition and processing**

410 We obtained somatic-mutation data for TARGET patients via the Genomic Data Commons portal<sup>65-67</sup>.  
411 We first selected the Repository section. Under the Cases tab, we specified the TARGET program. We  
412 also specified Wilms tumor, neuroblastoma, and osteosarcoma as the tumor types of interest (data were  
413 unavailable for the other two tumor types). Under the Files tab, we selected “simple nucleotide variation”  
414 and “annotated somatic mutation” as the data category and type, and we indicated that we would use  
415 variants that had been called using Mutect2<sup>68</sup>. The data were stored in VCF format (version 4.2)<sup>69</sup>.

416 We wrote custom code to parse the mutation data for each patient. We included only mutations that had  
417 either 1) “HIGH” impact according to the variant annotations or 2) had “MODERATE” impact and were  
418 considered to be “deleterious” by SIFT<sup>70</sup> or either “damaging” or “probably\_damaging” according to  
419 Polyphen-2<sup>71</sup>. We considered using the specified minor-allele-frequency (MAF) values for filtering, but  
420 those values were unavailable for a significant portion of the variants, so we focused on functional  
421 annotations.

#### 422 **RNA-fusion data acquisition and processing**

423 We downloaded data for RNA fusions via the Genomic Data Commons portal. Under the Cases tab, we  
424 applied the same filters that we used for obtaining the somatic-mutation data. Under the Files tab, we  
425 selected “structural variation” and “Transcript Fusion” as the data category and type. We specified  
426 “STAR-Fusion”<sup>72</sup> as the workflow type and “bedpe” as the data format. We wrote custom code to parse  
427 the RNA fusion data for each patient. The bedpe files described RNA transcripts from each patient that

428 had genetic information originating from two separate genes. We considered an RNA fusion to have a  
429 functional impact on both genes affected by the fusion.

### 430 **Methylation and mutation data integration**

431 Different naming conventions were used to identify neuroblastoma and osteosarcoma patients in the  
432 methylation data files versus the somatic-mutation and RNA fusion data files. We used a sample sheet  
433 provided by the Genomic Data Commons (gdc\_sample\_sheet.2021-03-11.tsv) and the sdrf metadata files  
434 for neuroblastoma and osteosarcoma to map the patient identifiers between these sources (see  
435 <https://target->  
436 [data.nci.nih.gov/Public/OS/methylation\\_array/METADATA/TARGET\\_OS\\_MethylationArray\\_20161103](https://target-data.nci.nih.gov/Public/OS/methylation_array/METADATA/TARGET_OS_MethylationArray_20161103)  
437 [.sdrf.txt](https://target-data.nci.nih.gov/Public/OS/methylation_array/METADATA/TARGET_OS_MethylationArray_20161103) and <https://target->  
438 [data.nci.nih.gov/Public/NBL/methylation\\_array/METADATA/TARGET\\_NBL\\_MethylationArray\\_20160](https://target-data.nci.nih.gov/Public/NBL/methylation_array/METADATA/TARGET_NBL_MethylationArray_20160812.sdrf.txt)  
439 [812.sdrf.txt](https://target-data.nci.nih.gov/Public/NBL/methylation_array/METADATA/TARGET_NBL_MethylationArray_20160812.sdrf.txt)). A few files did not map properly across naming conventions. One fusion data sample was  
440 mapped to two patients, so we excluded this sample. There were also two pairs of single nucleotide  
441 mutation samples that were mapped to single patients, so we excluded these samples.

### 442 **Inferring hypermethylation and hypomethylation states**

443 To determine hypermethylation and hypomethylation status, we scaled the beta values for each gene to  
444 have a zero mean and a standard deviation of one across all normal samples. Then for each tumor sample,  
445 we compared the beta value for a given gene against the standardized values from the normal samples. If  
446 a tumor's beta value was more than three standard deviations above the mean of the normal samples, we  
447 classified that tumor as being hypermethylated for that gene. If a tumor's beta value was more than three  
448 standard deviations below the mean of the normal samples, we classified that tumor as being  
449 hypomethylated for that gene.

450 **Mutual exclusivity**

451 We evaluated whether aberrant methylation—either hyper- or hypomethylation—was mutually exclusive  
452 with somatic-mutation events for a given gene. We calculated the total number of times a gene was both  
453 mutated and aberrantly methylated in the same tumor. Next we permuted methylation status for all tumors  
454 and kept mutation status constant. We repeated the permutation process 10,000 times to create an  
455 empirical null distribution to use as a baseline. For each permutation, we calculated the number of times a  
456 gene was both mutated and aberrantly methylated. We then compared the number of times that mutations  
457 co-occurred with aberrant methylation in the non-permuted data relative to the permuted data and  
458 calculated a p-value based on these numbers.

459 **Oncogenes vs tumor suppressor genes**

460 We identified genes known to be oncogenes or tumor suppressor genes, based on information from The  
461 Cancer Gene Census<sup>38</sup>. We included only tier 1 genes classified as “oncogene” or “TSG” and ignored any  
462 for which it was ambiguous or unknown. To be classified as a tier 1 gene, there must be scientific  
463 evidence that a gene plays a role in cancer development and that mutations in the gene modify the activity  
464 of the associated protein. Several genes were listed in the Cancer Genome Census as both oncogenes and  
465 tumor suppressor genes; because of this ambiguity, we excluded these from our analysis.

466 In evaluating our hypothesis that oncogenes generally have decreased methylation levels in tumor  
467 samples relative to normal samples and that tumor suppressor genes generally have increased methylation  
468 levels in tumor samples relative to normal samples, we applied a two-sided, Mann-Whitney U test to each  
469 oncogene and tumor suppressor gene to identify genes that did (or did not) align with these expectations.

470 **Abbreviations**

Abbreviation Term

WT Wilms tumor

|      |                                  |
|------|----------------------------------|
| CCSK | Clear cell sarcoma of the kidney |
| RT   | Rhabdoid tumor                   |
| NBL  | Neuroblastoma                    |
| OS   | Osteosarcoma                     |
| TSG  | Tumor suppressor gene            |

471

472

## 473 Tables

474 **Table 1: Summary of changes in methylation level/variance categories between normal and cancer**  
475 **datasets.** We assigned each gene to a category that indicated whether it was methylated at low, medium,  
476 or high levels and whether it had low or high variance across samples in a given dataset. The table shows  
477 the total number of genes in each category for the normal datasets and the number (and percentage) of  
478 genes that changed from one category to another in the tumor datasets.

| <b>Normal category</b>             | <b>Tumor category</b>              | <b>Total #<br/>genes</b> | <b># genes<br/>changed</b> | <b>% genes<br/>changed</b> |
|------------------------------------|------------------------------------|--------------------------|----------------------------|----------------------------|
| high methylation / low variance    | medium methylation / low variance  | 3403                     | 41                         | 1.2                        |
| low methylation / high variance    | low methylation / low variance     | 604                      | 20                         | 3.3                        |
| low methylation / high variance    | medium methylation / high variance | 604                      | 9                          | 1.5                        |
| low methylation / high variance    | medium methylation / low variance  | 604                      | 4                          | 0.66                       |
| low methylation / low variance     | low methylation / high variance    | 12368                    | 462                        | 3.7                        |
| low methylation / low variance     | medium methylation / low variance  | 12368                    | 87                         | 0.7                        |
| medium methylation / high variance | low methylation / high variance    | 227                      | 137                        | 60                         |
| medium methylation / high variance | medium methylation / low variance  | 227                      | 19                         | 8.4                        |
| medium methylation / low variance  | high methylation / low variance    | 5651                     | 159                        | 2.8                        |
| medium methylation / low variance  | low methylation / high variance    | 5651                     | 23                         | 0.41                       |
| medium methylation / low variance  | low methylation / low variance     | 5651                     | 52                         | 0.92                       |
| medium methylation / low variance  | medium methylation / high variance | 5651                     | 34                         | 0.6                        |

479

480

481 **Table 2: Aberrant methylation and mutation rates in oncogenes, tumor suppressor genes, and all**  
482 **other genes.** For three pediatric tumor types, we identified aberrant methylation events (either  
483 hypomethylation or hypermethylation) that had occurred in a given tumor and gene. For the same  
484 tumor/gene combinations, we identified somatic single-nucleotide variants, indels, and structural variants  
485 that had occurred. These numbers indicate overall rates of aberrant methylation or mutation across all  
486 tumors of a given type. Methylation rates and mutation rates were typically similar across all three gene  
487 categories, but mutation rates for oncogenes and tumor suppressor genes were always higher than for  
488 other genes.

| <b>Tumor type</b> | <b>Aberration type</b> | <b>Oncogenes</b> | <b>TSG</b> | <b>Other</b> |
|-------------------|------------------------|------------------|------------|--------------|
| Wilms tumor       | Mutation               | 0.04             | 0.034      | 0.017        |
| Wilms tumor       | Methylation            | 0.012            | 0.012      | 0.014        |
| Neuroblastoma     | Mutation               | 0.083            | 0.089      | 0.046        |
| Neuroblastoma     | Methylation            | 0.007            | 0.007      | 0.008        |
| Osteosarcoma      | Mutation               | 0.031            | 0.034      | 0.018        |
| Osteosarcoma      | Methylation            | 0.014            | 0.011      | 0.014        |

489 **Figures**

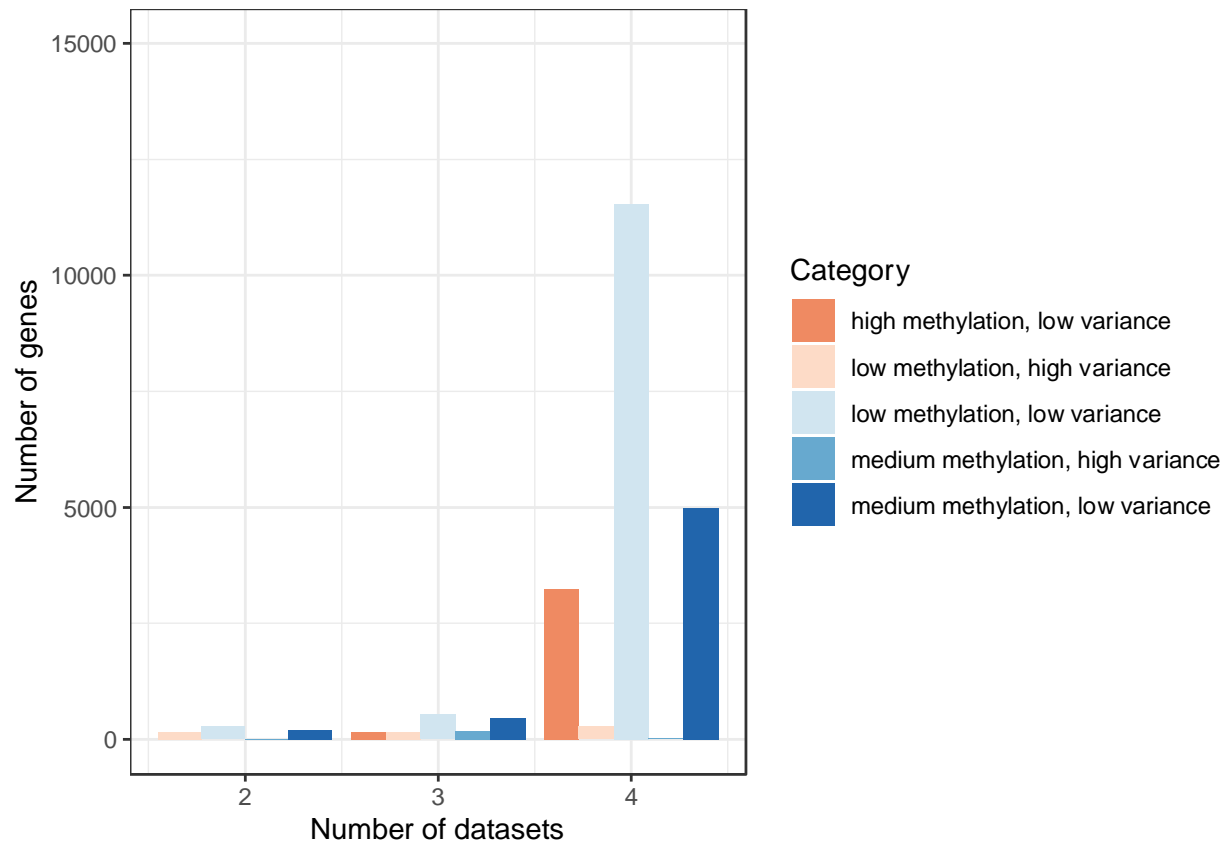

490

491 **Figure 1: Consistency of DNA methylation levels and variances in normal cells.** We assigned each  
492 gene to a category that indicated whether it was methylated at low, medium, or high levels and whether it  
493 had low or high variance across samples in a given dataset. For each gene, we counted the maximum  
494 number of datasets for which the level / variance category was consistent. For most genes, the category  
495 was consistent across all four datasets.



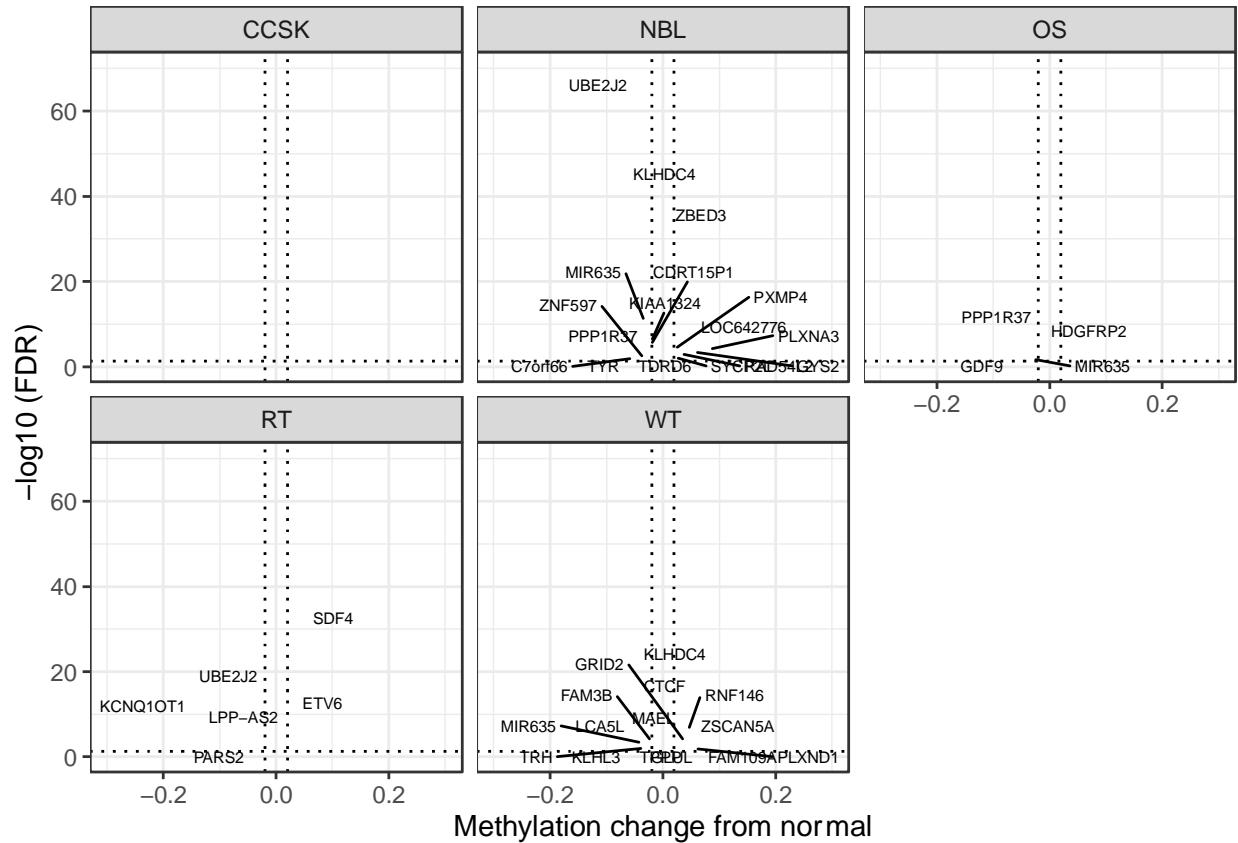

496

497 **Figure 2: Volcano plots showing differentially methylated genes for each tumor type.** For each tumor  
 498 type, we compared methylation levels at the gene level between tumors and the normal samples. Genes  
 499 showing significantly different methylation levels between tumor and normal conditions are highlighted.

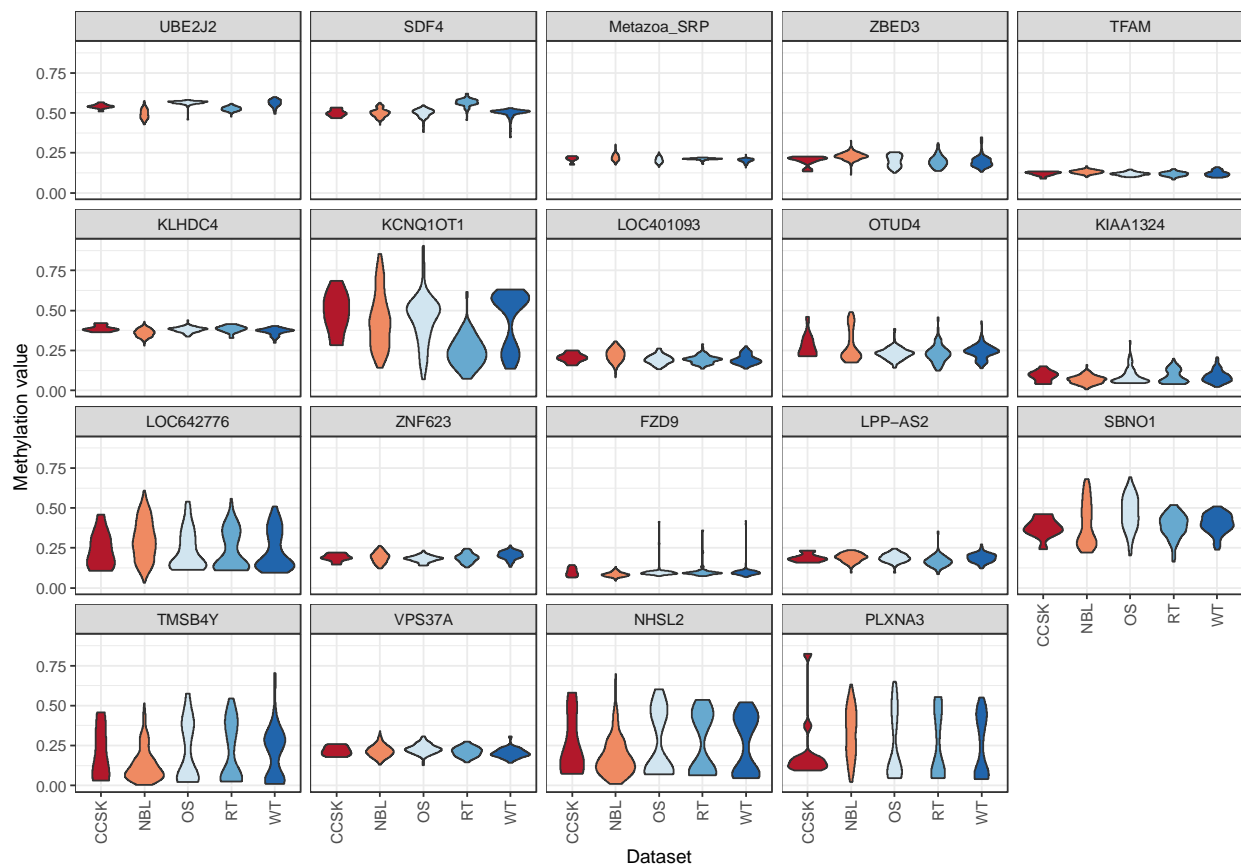

500

501 **Figure 3: Methylation levels for genes that differed significantly across the tumor types.** One-way  
502 ANOVA tests applied to tumor methylation levels identified 19 genes for which the means differed  
503 significantly across the tumor types. These violin plots show the range and density of the methylation  
504 values for these genes across the tumor types.

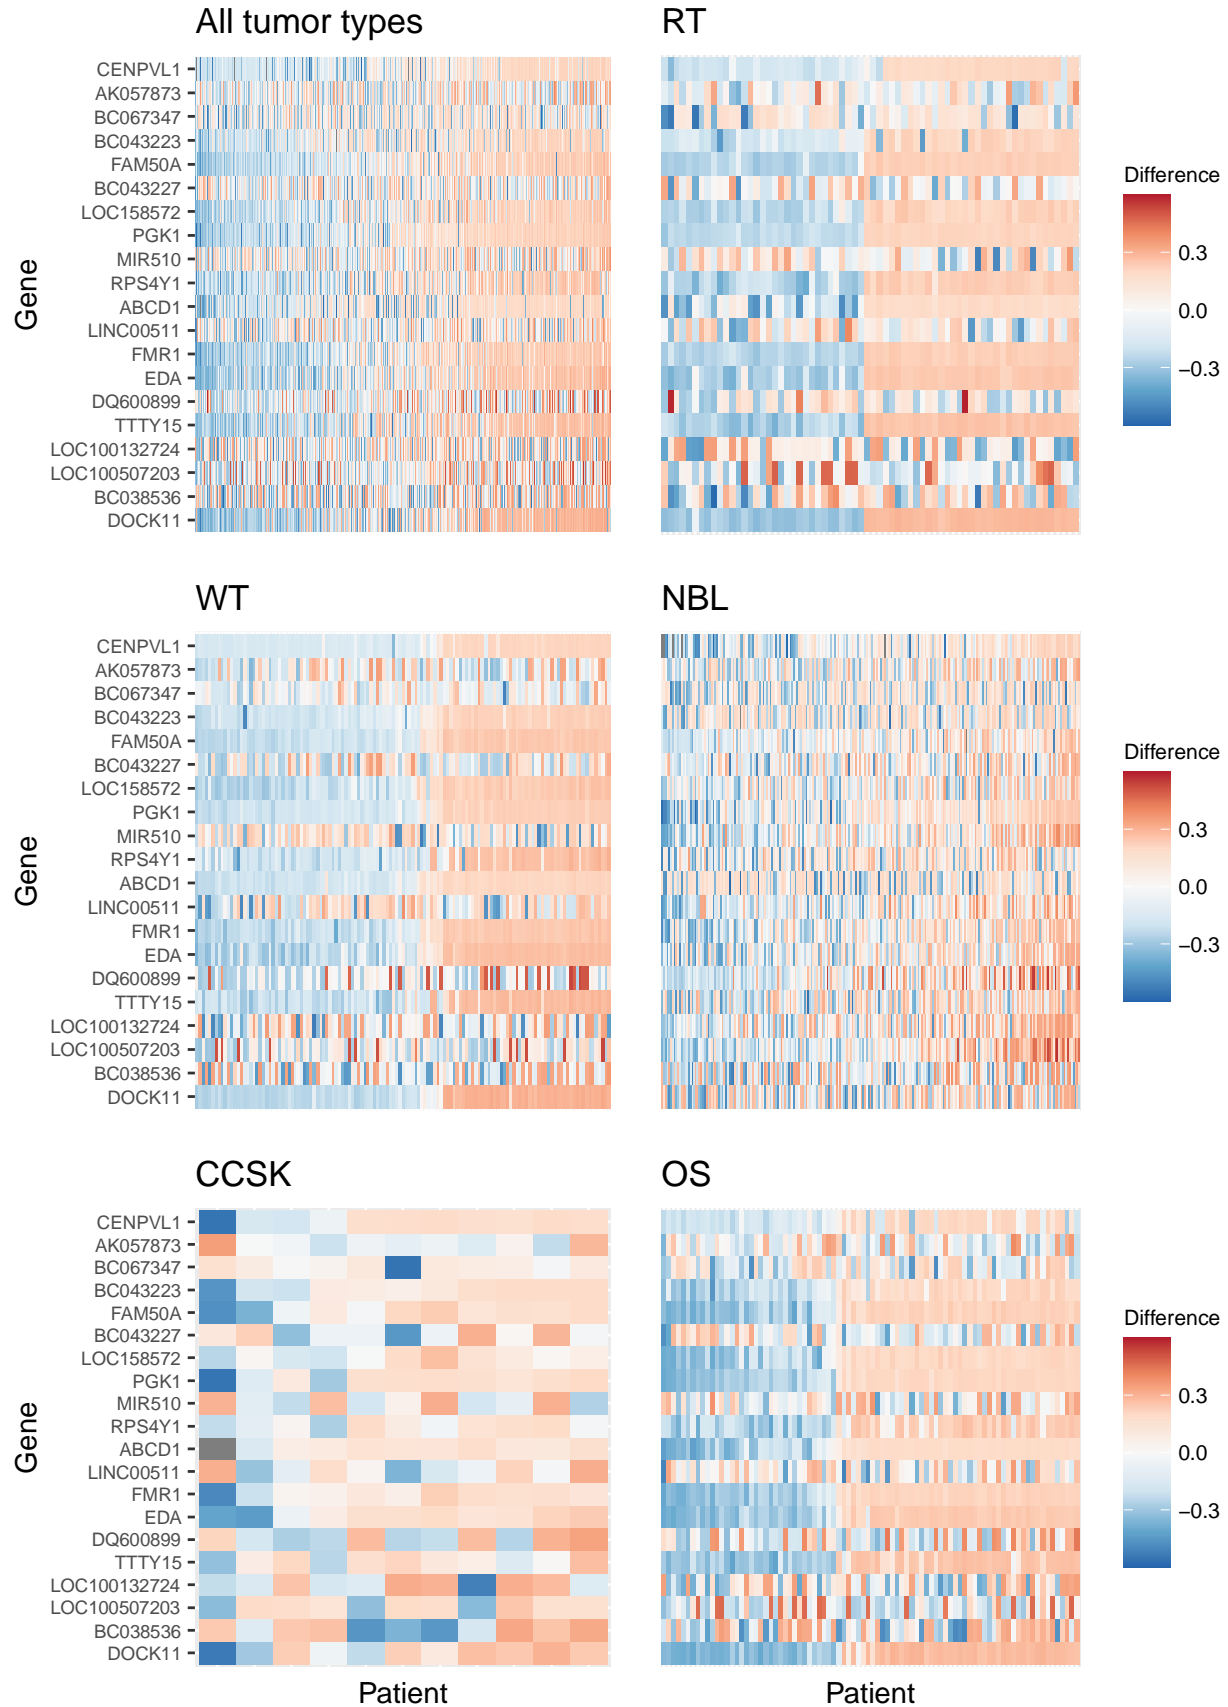

506 **Figure 4: Gene-level DNA methylation changes for high-variance genes.** Rows in these heatmaps  
507 indicate methylation levels, relative to the normal data, for the 20 genes with the largest variance across  
508 the tumor types. Columns represent individual tumors. Approximately half of all tumors exhibited  
509 consistently lower methylation levels than the remaining tumors.

510

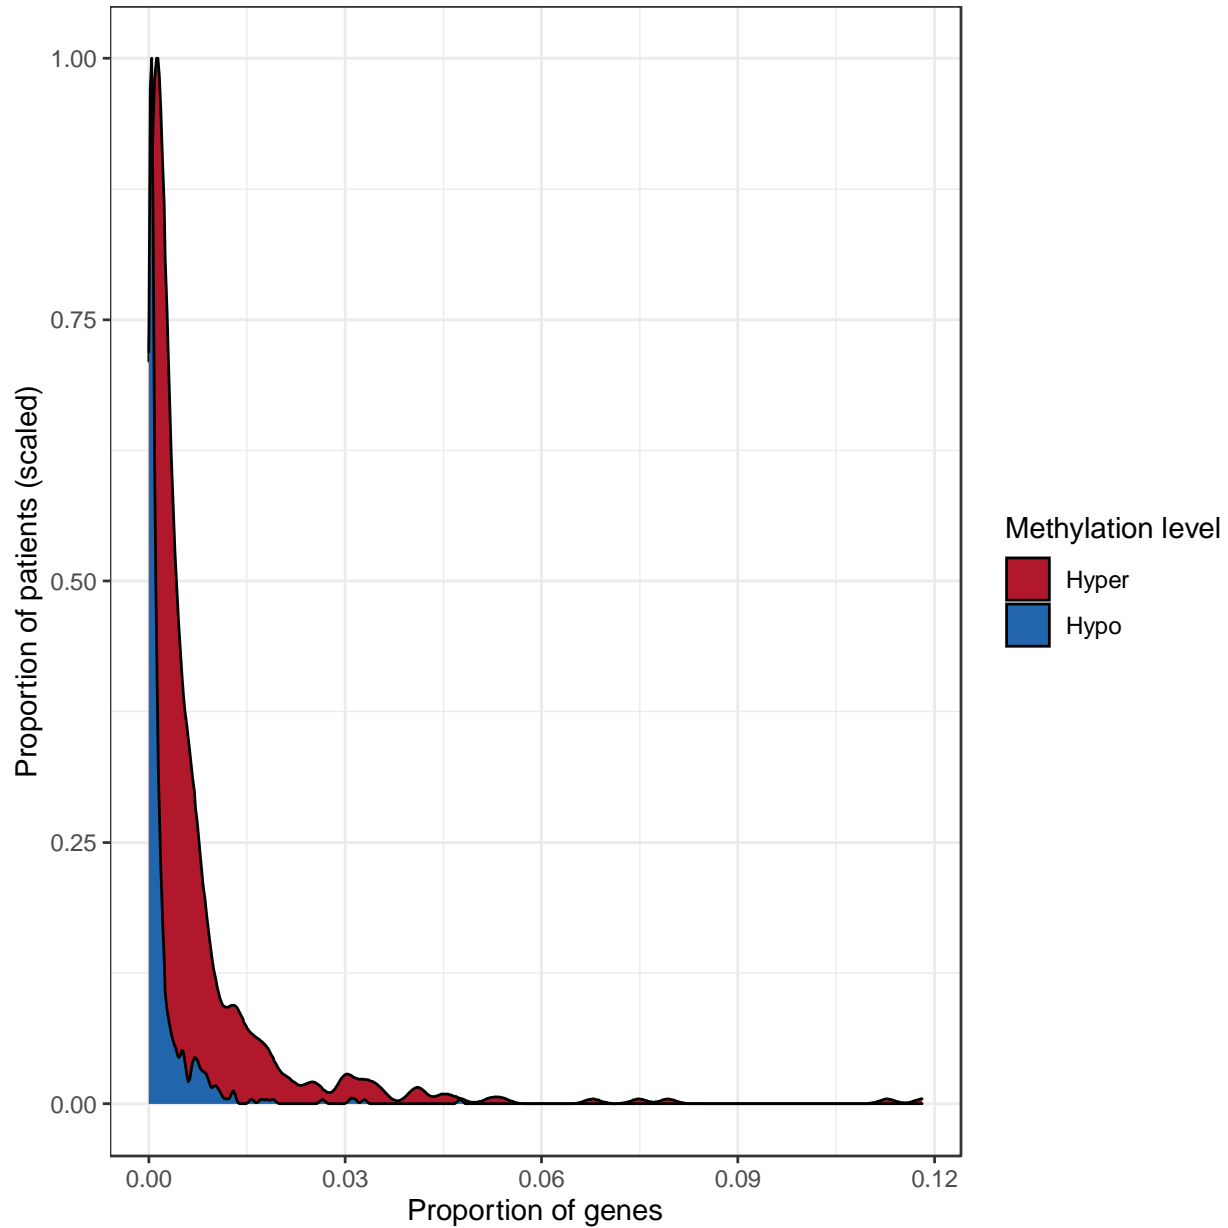

511

512 **Figure 5: Distributions of the proportion of hypermethylated or hypomethylated genes in a given**

513 **tumor.** Using the normal data as a reference, we identified genes that were hypermethylated or

514 hypomethylated in a given tumor. All five tumor types are represented. A relatively large number of

515 hypermethylated genes in a given tumor was more common than a relatively large number of

516 hypomethylated genes.

## 517 **Acknowledgements**

518 We thank the research participants who donated samples for molecular profiling and the researchers who  
519 consented to have their data shared publicly. We thank the College of Life Sciences at Brigham Young  
520 University for providing funding to ACP through a College Undergraduate Research Award. The results  
521 published here are in whole or part based upon data generated by the Therapeutically Applicable  
522 Research to Generate Effective Treatments (TARGET) initiative, phs000218, managed by the NCI. The  
523 data used for this analysis are available from the National Cancer Institute Genomic Data Commons  
524 (<https://gdc.cancer.gov>). Information about TARGET can be found at  
525 <http://ocg.cancer.gov/programs/target>.

### 526 **Ethics approval and consent to participate**

527 Brigham Young University's Institutional Review Board approved this study under exemption status.  
528 This study uses data collected from public repositories only. We played no part in recruiting patients or  
529 obtaining consent.

### 530 **Competing Interests**

531 The authors declare that they have no competing interests.

### 532 **Code and data availability**

533 All of the code used to perform the analysis is publicly available on Open Science Framework so that  
534 others can verify and build upon our work (<https://osf.io/79yfb/>).

### 535 **Author Contributions**

536 The contributions listed below correspond to the CRediT Taxonomy<sup>73</sup>.

537 ACP: Conceptualization, Formal Analysis, Funding Acquisition, Investigation, Methodology, Software,  
538 Visualization, Writing – Original Draft Preparation, Writing – Review & Editing  
539 BIQ: Conceptualization, Formal Analysis, Software, Visualization, Writing – Original Draft Preparation,  
540 Writing – Review & Editing  
541 SRP: Conceptualization, Funding Acquisition, Methodology, Project Administration, Resources,  
542 Supervision, Writing – Review & Editing

## 543 **References**

- 544 1. Filbin, M. & Monje, M. Developmental origins and emerging therapeutic opportunities for  
545 childhood cancer. *Nat. Med.* **25**, 367–376 (2019).
- 546 2. Oeffinger, K. C., Eshelman, D. A., Tomlinson, G. E., Buchanan, G. R. & Foster, B. M. Grading  
547 of late effects in young adult survivors of childhood cancer followed in an ambulatory adult setting.  
548 *Cancer* **88**, 1687–1695 (2000).
- 549 3. Stratton, M. R., Campbell, P. J. & Futreal, P. A. The cancer genome. *Nature* **458**, 719–724  
550 (2009).
- 551 4. Yiu, T. T. & Li, W. Pediatric cancer epigenome and the influence of folate. *Epigenomics* **7**, 961–  
552 973 (2015).
- 553 5. Gröbner, S. N. *et al.* The landscape of genomic alterations across childhood cancers. *Nature* **555**,  
554 321–327 (2018).
- 555 6. Mack, S. C. *et al.* Epigenomic alterations define lethal CIMP-positive ependymomas of infancy.  
556 *Nature* **506**, 445–450 (2014).
- 557 7. Bayliss, J. *et al.* Lowered H3K27me3 and DNA hypomethylation define poorly prognostic  
558 pediatric posterior fossa ependymomas. *Science Translational Medicine* **8**, 366ra161–366ra161 (2016).
- 559 8. Ehrlich, M. DNA hypomethylation in cancer cells. *Epigenomics* **1**, 239–259 (2009).

- 560 9. Hanahan, D. & Weinberg, R. A. Hallmarks of cancer: The next generation. *Cell* **144**, 646–674  
561 (2011).
- 562 10. Croce, C. M. Oncogenes and Cancer. *N. Engl. J. Med.* **358**, 502–511 (2008).
- 563 11. Macleod, K. Tumor suppressor genes. *Current Opinion in Genetics & Development* **10**, 81–93  
564 (2000).
- 565 12. Spainhour, J. C., Lim, H. S., Yi, S. V. & Qiu, P. Correlation Patterns Between DNA Methylation  
566 and Gene Expression in The Cancer Genome Atlas. *Cancer Inform* **18**, 1176935119828776 (2019).
- 567 13. Esteller, M. Epigenetic gene silencing in cancer: The DNA hypermethylome. *Hum. Mol. Genet.*  
568 **16**, R50–R59 (2007).
- 569 14. Liu, J. *et al.* Identification of aberrantly methylated differentially expressed genes and associated  
570 pathways in endometrial cancer using integrated bioinformatic analysis. *Cancer Med.* **9**, 3522–3536  
571 (2020).
- 572 15. Shi, M., Tsui, S. K.-W., Wu, H. & Wei, Y. Pan-cancer analysis of differential DNA methylation  
573 patterns. *BMC Medical Genomics* **13**, 154 (2020).
- 574 16. Dunwell, T. L. *et al.* Epigenetic analysis of childhood acute lymphoblastic leukemia. *Epigenetics*  
575 **4**, 185–193 (2009).
- 576 17. Saghafinia, S., Mina, M., Riggi, N., Hanahan, D. & Ciriello, G. Pan-Cancer Landscape of  
577 Aberrant DNA Methylation across Human Tumors. *Cell Reports* **25**, 1066–1080.e8 (2018).
- 578 18. Karlow, J. A., Miao, B., Xing, X., Wang, T. & Zhang, B. Common DNA methylation dynamics  
579 in endometriod adenocarcinoma and glioblastoma suggest universal epigenomic alterations in  
580 tumorigenesis. *Commun Biol* **4**, 1–16 (2021).
- 581 19. Bolouri, H. *et al.* The molecular landscape of pediatric acute myeloid leukemia reveals recurrent  
582 structural alterations and age-specific mutational interactions. *Nat Med* **24**, 103–112 (2018).
- 583 20. Issa, J.-P. J. & Kantarjian, H. M. Targeting DNA Methylation. *Clin Cancer Res* **15**, 3938–3946  
584 (2009).



- 585 21. Yu, J. *et al.* Methylation-mediated downregulation of the B-cell translocation gene 3 (BTG3) in  
586 breast cancer cells. *Gene Expr* **14**, 173–182 (2008).
- 587 22. Majid, S. *et al.* Genistein reverses hypermethylation and induces active histone modifications in  
588 tumor suppressor gene B-Cell translocation gene 3 in prostate cancer. *Cancer* **116**, 66–76 (2010).
- 589 23. Majid, S. *et al.* BTG3 tumor suppressor gene promoter demethylation, histone modification and  
590 cell cycle arrest by genistein in renal cancer. *Carcinogenesis* **30**, 662–670 (2009).
- 591 24. Almstrup, K. *et al.* Improved gene expression signature of testicular carcinoma in situ. *Int J*  
592 *Androl* **30**, 292–302; discussion 303 (2007).
- 593 25. Reeskamp, L. F. *et al.* Differential DNA methylation in familial hypercholesterolemia.  
594 *EBioMedicine* **61**, 103079 (2020).
- 595 26. Benjamini, Y. & Hochberg, Y. Controlling the False Discovery Rate: A Practical and Powerful  
596 Approach to Multiple Testing. *J. R. Stat. Soc. Ser. B Methodol.* **57**, 289–300 (1995).
- 597 27. Jassal, B. *et al.* The reactome pathway knowledgebase. *Nucleic Acids Res* **48**, D498–D503  
598 (2020).
- 599 28. Fabregat, A. *et al.* Reactome pathway analysis: A high-performance in-memory approach. *BMC*  
600 *Bioinformatics* **18**, (2017).
- 601 29. Futreal, P. A. *et al.* A CENSUS OF HUMAN CANCER GENES. *Nat Rev Cancer* **4**, 177–183  
602 (2004).
- 603 30. Goode, E. L., Ulrich, C. M. & Potter, J. D. Polymorphisms in DNA Repair Genes and  
604 Associations with Cancer Risk. *Cancer Epidemiol Biomarkers Prev* **11**, 1513–1530 (2002).
- 605 31. Forrest, S. J., Geoerger, B. & Janeway, K. A. Precision medicine in pediatric oncology. *Curr*  
606 *Opin Pediatr* **30**, 17–24 (2018).
- 607 32. Bodily, W. R. *et al.* Effects of germline and somatic events in candidate BRCA-like genes on  
608 breast-tumor signatures. *PLoS One* **15**, (2020).
- 609 33. Ciriello, G., Cerami, E., Sander, C. & Schultz, N. Mutual exclusivity analysis identifies  
610 oncogenic network modules. *Genome Res* **22**, 398–406 (2012).

- 611 34. Babur, Ö. *et al.* Systematic identification of cancer driving signaling pathways based on mutual  
612 exclusivity of genomic alterations. *Genome Biol* **16**, 45 (2015).
- 613 35. Kang, S. *et al.* Mutual exclusiveness between PIK3CA and KRAS mutations in endometrial  
614 carcinoma. *Int J Gynecol Cancer* **18**, 1339–1343 (2008 Nov-Dec).
- 615 36. Szczurek, E. & Beerenwinkel, N. Modeling mutual exclusivity of cancer mutations. *PLoS*  
616 *Comput Biol* **10**, e1003503 (2014).
- 617 37. Ding, W., Feng, G., Hu, Y., Chen, G. & Shi, T. Co-occurrence and Mutual Exclusivity Analysis  
618 of DNA Methylation Reveals Distinct Subtypes in Multiple Cancers. *Front Cell Dev Biol* **8**, 20 (2020).
- 619 38. Tate, J. G. *et al.* COSMIC: The Catalogue Of Somatic Mutations In Cancer. *Nucleic Acids Res*  
620 **47**, D941–D947 (2019).
- 621 39. Keelawat, S. *et al.* Detection of global hypermethylation in well-differentiated thyroid neoplasms  
622 by immunohistochemical (5-methylcytidine) analysis. *J Endocrinol Invest* **38**, 725–732 (2015).
- 623 40. Toyota, M. *et al.* CpG island methylator phenotype in colorectal cancer. *PNAS* **96**, 8681–8686  
624 (1999).
- 625 41. Segura-Pacheco, B. *et al.* Global DNA hypermethylation-associated cancer chemotherapy  
626 resistance and its reversion with the demethylating agent hydralazine. *Journal of Translational Medicine*  
627 **4**, 32 (2006).
- 628 42. Feinberg, A. P. & Tycko, B. The history of cancer epigenetics. *Nat Rev Cancer* **4**, 143–153  
629 (2004).
- 630 43. Shlien, A. & Malkin, D. Copy number variations and cancer. *Genome Medicine* **1**, 62 (2009).
- 631 44. Ohlsson, R., Renkawitz, R. & Lobanenko, V. CTCF is a uniquely versatile transcription  
632 regulator linked to epigenetics and disease. *Trends in Genetics* **17**, 520–527 (2001).
- 633 45. Wiehle, L. *et al.* DNA (de)methylation in embryonic stem cells controls CTCF-dependent  
634 chromatin boundaries. *Genome Res* **29**, 750–761 (2019).
- 635 46. Kemp, C. J. *et al.* CTCF Haploinsufficiency Destabilizes DNA Methylation and Predisposes to  
636 Cancer. *Cell Reports* **7**, 1020–1029 (2014).

- 637 47. Oh, S., Oh, C. & Yoo, K. H. Functional roles of CTCF in breast cancer. *BMB Rep* **50**, 445–453  
638 (2017).
- 639 48. Roberti, A., Valdes, A. F., Torrecillas, R., Fraga, M. F. & Fernandez, A. F. Epigenetics in cancer  
640 therapy and nanomedicine. *Clinical Epigenetics* **11**, 81 (2019).
- 641 49. Cheishvili, D., Boureau, L. & Szyf, M. DNA demethylation and invasive cancer: Implications for  
642 therapeutics. *Br J Pharmacol* **172**, 2705–2715 (2015).
- 643 50. Dedeurwaerder, S. *et al.* A comprehensive overview of Infinium HumanMethylation450 data  
644 processing. *Brief Bioinform* **15**, 929–941 (2014).
- 645 51. Price, E. M. *et al.* Profiling placental and fetal DNA methylation in human neural tube defects.  
646 *Epigenetics Chromatin* **9**, 6 (2016).
- 647 52. Yang, I. V. *et al.* The nasal methylome and childhood atopic asthma. *J Allergy Clin Immunol* **139**,  
648 1478–1488 (2017).
- 649 53. Zhang, X. *et al.* Nasal DNA methylation is associated with childhood asthma. *Epigenomics* **10**,  
650 629–641 (2018).
- 651 54. van Dijk, S. J. *et al.* Effect of prenatal DHA supplementation on the infant epigenome: Results  
652 from a randomized controlled trial. *Clin Epigenetics* **8**, 114 (2016).
- 653 55. Oelsner, K. T., Guo, Y., To, S. B.-C., Non, A. L. & Barkin, S. L. Maternal BMI as a predictor of  
654 methylation of obesity-related genes in saliva samples from preschool-age Hispanic children at-risk for  
655 obesity. *BMC Genomics* **18**, 57 (2017).
- 656 56. Armstrong, D. A., Lesueur, C., Conradt, E., Lester, B. M. & Marsit, C. J. Global and gene-  
657 specific DNA methylation across multiple tissues in early infancy: Implications for children’s health  
658 research. *FASEB J.* **28**, 2088–2097 (2014).
- 659 57. Godderis, L. *et al.* Global Methylation and Hydroxymethylation in DNA from Blood and Saliva  
660 in Healthy Volunteers. *BioMed Res. Int.* **2015**, e845041 (2015).

- 661 58. Smith, A. K. *et al.* DNA extracted from saliva for methylation studies of psychiatric traits:  
662 Evidence tissue specificity and relatedness to brain. *Am. J. Med. Genet. B Neuropsychiatr. Genet.* **168**,  
663 36–44 (2015).
- 664 59. Aryee, M. J. *et al.* Minfi: A flexible and comprehensive Bioconductor package for the analysis of  
665 Infinium DNA methylation microarrays. *Bioinformatics* **30**, 1363–1369 (2014).
- 666 60. Amezquita, R. A. *et al.* Orchestrating single-cell analysis with Bioconductor. *Nat. Methods* **17**,  
667 137–145 (2020).
- 668 61. Price, M. E. *et al.* Additional annotation enhances potential for biologically-relevant analysis of  
669 the Illumina Infinium HumanMethylation450 BeadChip array. *Epigenetics Chromatin* **6**, 4 (2013).
- 670 62. Wickham, H. *Rvest: Easily harvest (scrape) web pages.* (2020).
- 671 63. Warnes, G. R., Bolker, B. & Lumley, T. *Gtools: Various r programming tools.* (2020).
- 672 64. Leek, J. T., Johnson, W. E., Parker, H. S., Jaffe, A. E. & Storey, J. D. The sva package for  
673 removing batch effects and other unwanted variation in high-throughput experiments. *Bioinformatics* **28**,  
674 882–883 (2012).
- 675 65. Grossman, R. L. *et al.* Toward a Shared Vision for Cancer Genomic Data. *N Engl J Med* **375**,  
676 1109–1112 (2016).
- 677 66. Pugh, T. J. *et al.* The genetic landscape of high-risk neuroblastoma. *Nat Genet* **45**, 279–284  
678 (2013).
- 679 67. Gadd, S. *et al.* A Children’s Oncology Group and TARGET initiative exploring the genetic  
680 landscape of Wilms tumor. *Nat Genet* **49**, 1487–1494 (2017).
- 681 68. Benjamin, D. *et al.* Calling Somatic SNVs and Indels with Mutect2. *bioRxiv* 861054 (2019)  
682 doi:[10.1101/861054](https://doi.org/10.1101/861054).
- 683 69. Danecek, P. *et al.* The variant call format and VCFtools. *Bioinformatics* **27**, 2156–2158 (2011).
- 684 70. Vaser, R., Adusumalli, S., Leng, S. N., Sikic, M. & Ng, P. C. SIFT missense predictions for  
685 genomes. *Nat. Protoc.* **11**, 1–9 (2016).

- 686 71. Adzhubei, I., Jordan, D. M. & Sunyaev, S. R. Predicting Functional Effect of Human Missense  
687 Mutations Using PolyPhen-2. *Curr. Protoc. Hum. Genet.* **76**, 7.20.1–7.20.41 (2013).
- 688 72. Haas, B. J. *et al.* Accuracy assessment of fusion transcript detection via read-mapping and de  
689 novo fusion transcript assembly-based methods. *Genome Biology* **20**, 213 (2019).
- 690 73. Brand, A., Allen, L., Altman, M., Hlava, M. & Scott, J. Beyond authorship: Attribution,  
691 contribution, collaboration, and credit. *Learn. Publ.* **28**, 151–155 (2015).
